# Supplementary material for: GSTO1*CC Genotype (rs4925) Predicts Shorter Survival in Clear Cell Renal Cell Carcinoma Male Patients
Source: MDPI journal article supplement (doi:10.3390/cancers11122038), 2019-12-17
Supplement: s1 [file s1]

## **Supplementary Materials: *GSTO1*\*CC Genotype (rs4925) Predicts Shorter Survival in Clear Cell Renal Cell Carcinoma Male Patients**

Tanja Radic, Vesna Coric, Zoran Bukumiric, Marija Pljesa-Ercegovac, Tatjana Djukic, Natasa Avramovic, Marija Matic, Smiljana Mihailovic, Dejan Dragicevic, Zoran Dzamic, Tatjana Simic and Ana Savic-Radojevic

a)

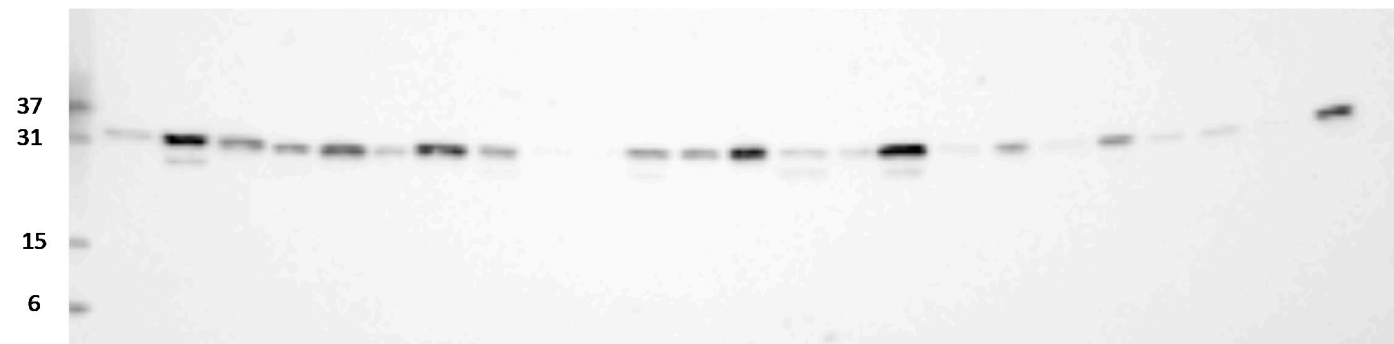

GSTO1

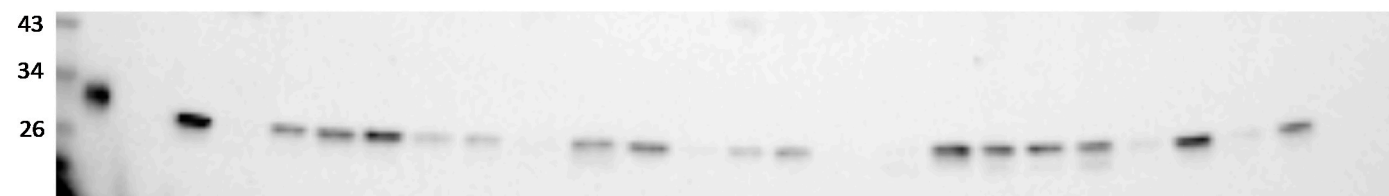

GSTO1

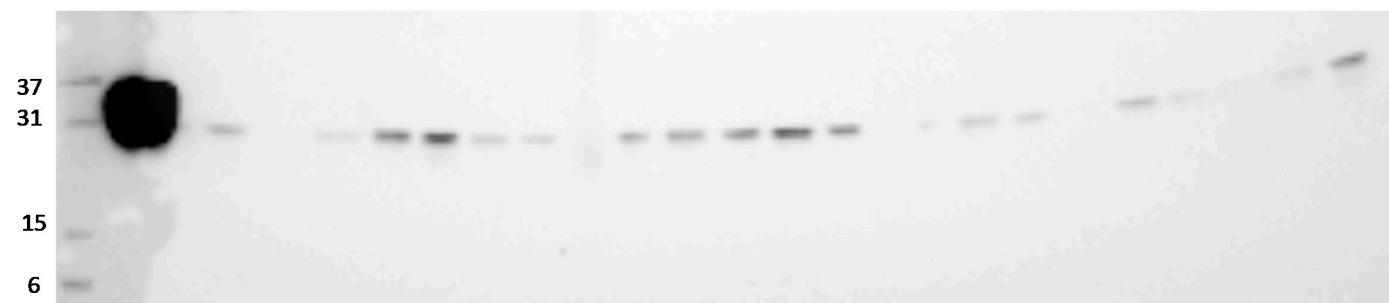

GSTO1

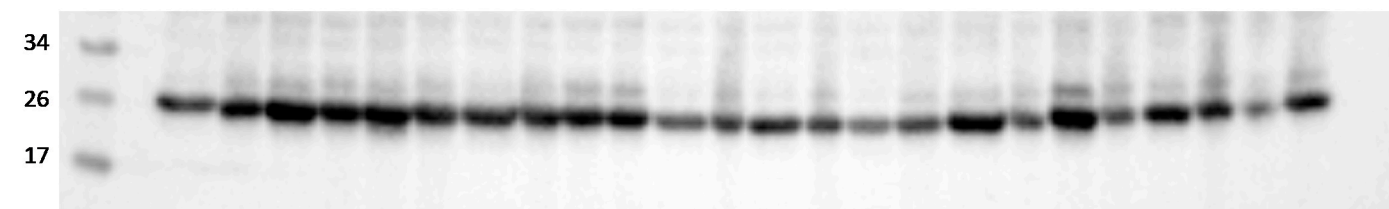

GSTO1

b)

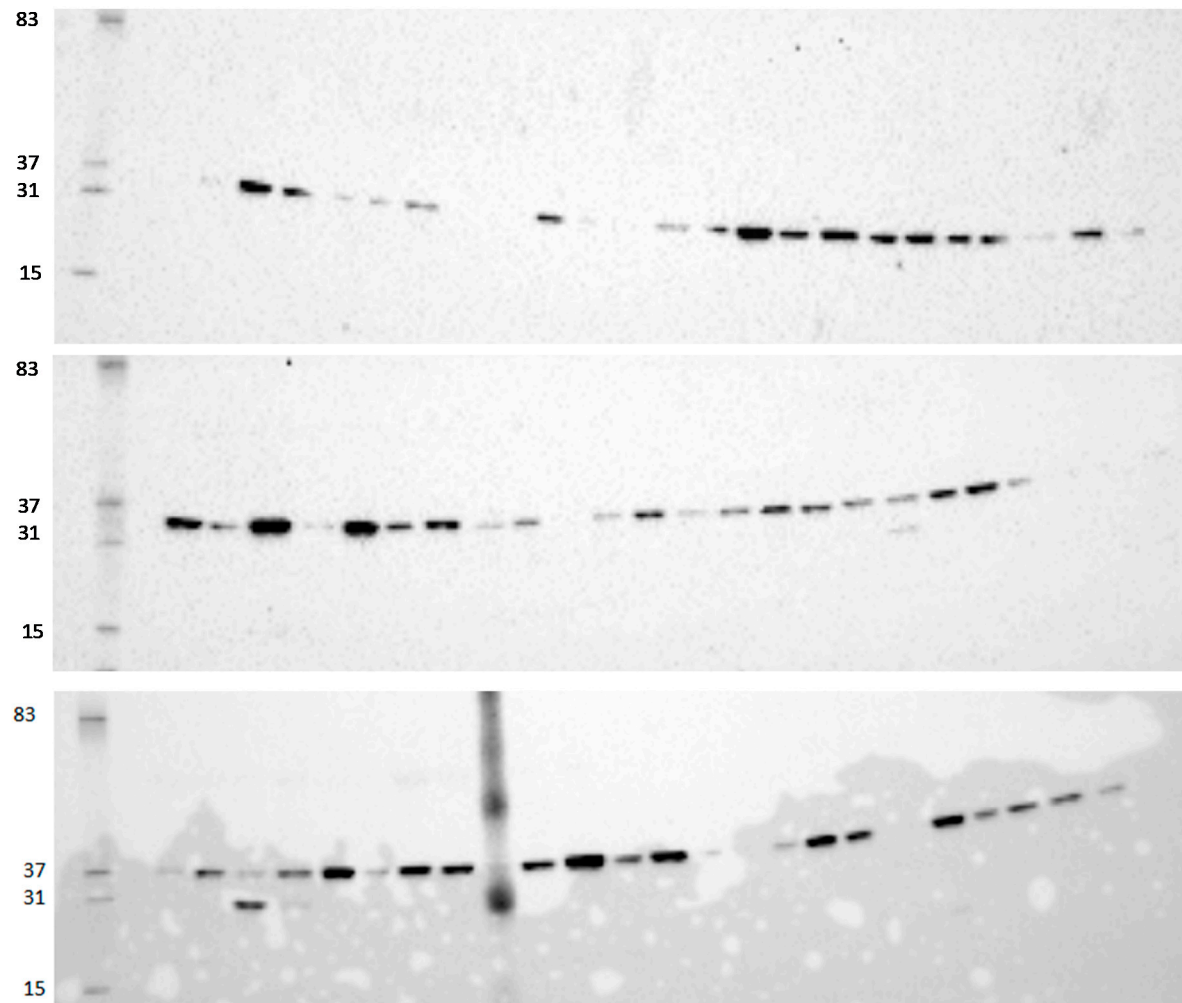

c)

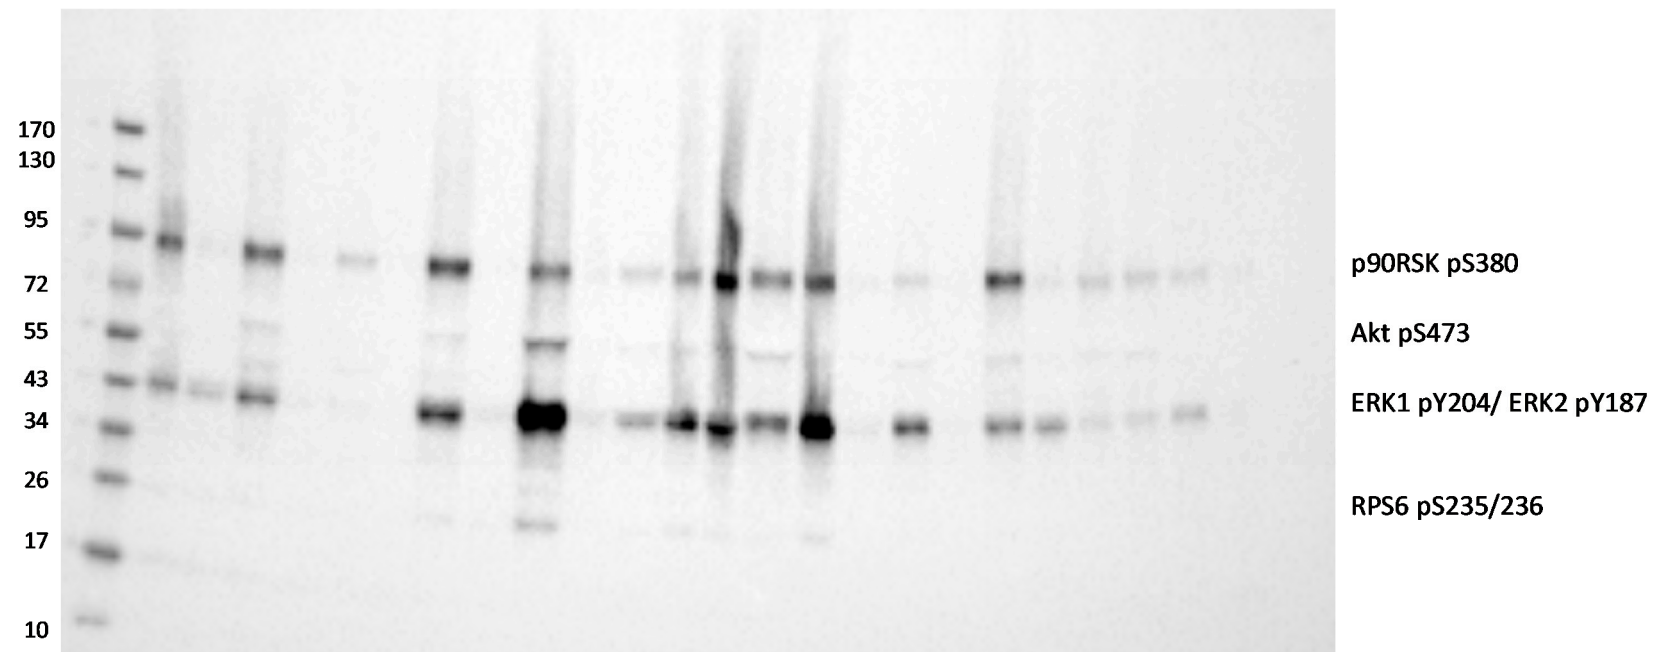

d)

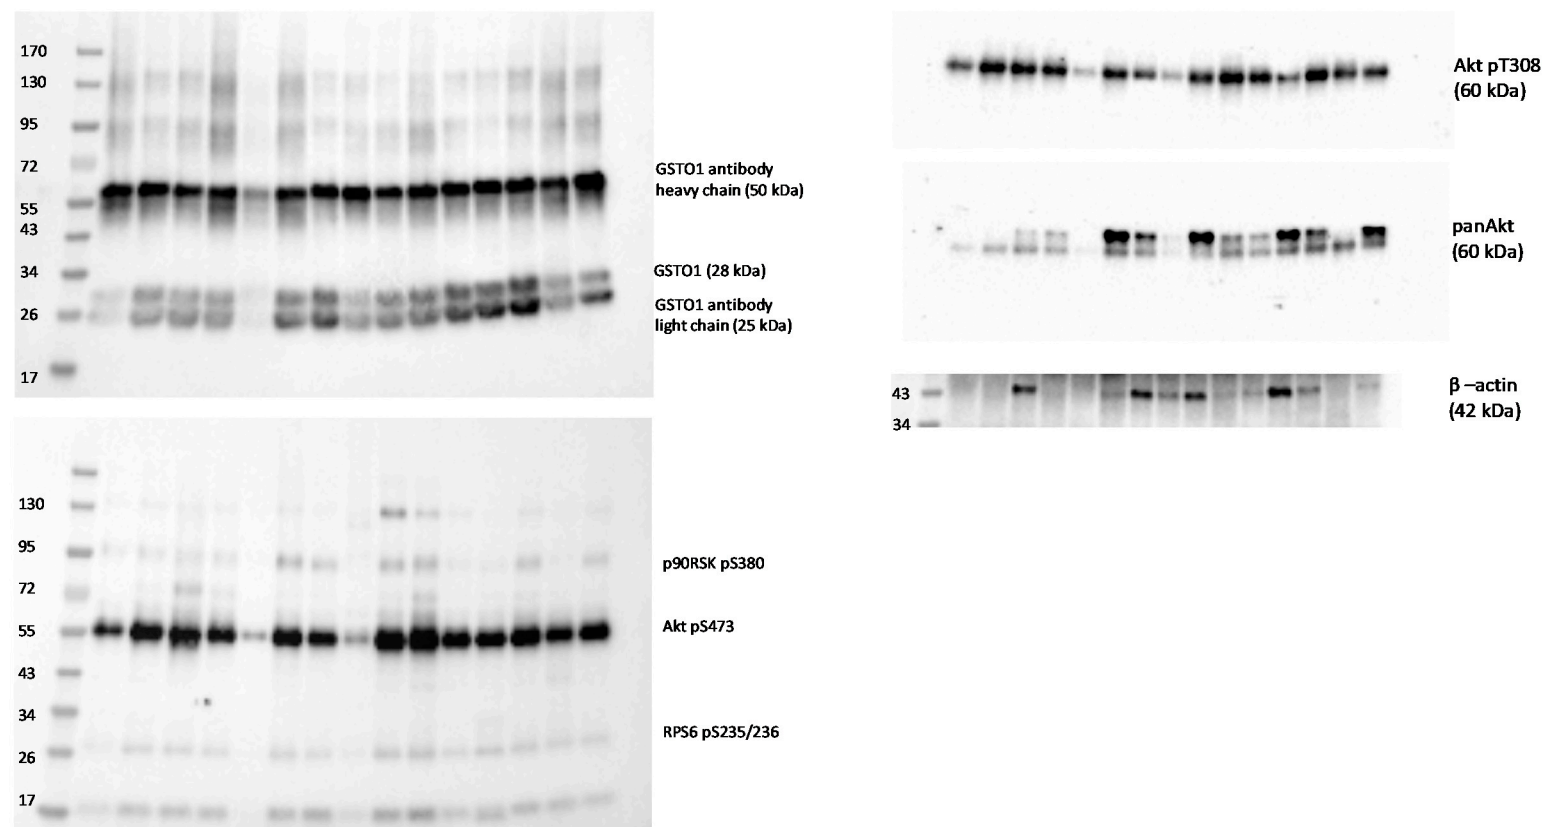

**Figure S1.** Whole Western Blots with molecular weights. (a) Western blots for figure 2a). (b) Western blots for figure 2b). (c) Western blot for figure 3. (d) Western blots for figure 4.

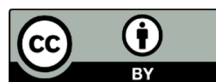

© 2019 by the authors. Licensee MDPI, Basel, Switzerland. This article is an open access article distributed under the terms and conditions of the Creative Commons Attribution (CC BY) license (<http://creativecommons.org/licenses/by/4.0/>).
