# Supplementary material for: GSTO1*CC Genotype (rs4925) Predicts Shorter Survival in Clear Cell Renal Cell Carcinoma Male Patients
Source: Cancers (Basel). 2019 Dec 17;11(12):2038. doi: 10.3390/cancers11122038 (PMC6966599; doi:10.3390/cancers11122038)
Supplement: Supplementary file 1 [file cancers-11-02038-s001.zip › cancers-659957-supplementary/Supplemental Material 1.xlsx]

## Sheet: Sheet1
	GSTO1 intensity ratios				GSTO2 intensity ratios				RSK1p90 pS380 densitometry readings				Akt pS473 densitometry readings				ERK1/2 pY204/197 densitometry readings					RPS6 pS235/236 densitometry readings
	tumor	non-tumor			tumor	non-tumor			tumor	non-tumor			tumor	non-tumor			tumor	non-tumor				tumor	non-tumor
	184.585	105.167			19.8986	6.7784			235812	17231.1			11558.7	0			180100	84020				3623.22	6564.21
	229.321	44.075			9.3894	1.30324			367299	0			39614	0			322720	5982.59				7362.33	8744.63
	222.888	113.595			42.8272	22.3677			78727.1	738.857			4814	0			18727.6	0				6561.53	1712.6
	139.807	116.127			36.0607	31.1403			543548	0			39563.4	0			689861	14867.4				39423	7364.74
	282.453	62.6549			141.061	26.5136			343055	12366.9			231040	0			2.73138e+06	27050.7				177271	1802.78
	55.2497	99.1891			9.00889	9.99763			81732.4	169367			0	41596			200428	477780				4997	39949.1
	16.9244	22.1505			1.81001	3.58041			501556	346485			130688	44540.3			577079	344300				16989.4	17380.6
	61.5162	5.31218			37.3612	15.3743			299508	13063.6			98607.2	1170.12			1.39072e+06	9278.67				36781.9	67.3
	17.3064	26.1604			73.5121	20.5087			59149.6	3011.06			18954.5	1296.24			420006	7678				2611.29	0
	100.94	53.6825			177.517	6.48179			471648	20166.7			38689.6	6218			293896	171327				7973.27	4505
	57.0245	47.2952			101.621	26.2965			60378	68361.4			15734.7	12471			48615.6	55905.5				0	825.421
	92.5052	96.6172			65.4822	10.1726			50058.7	13280.9			0	0			107891	13096.4				4061	182.421
	20.3504	15.2933			6.75155	34.2462
	43.9436	46.8589			5.63451	20.528
	91.3261	39.7036			35.2516	31.6262
	130.447	112.012			18.9509	19.1817
	144.436	109.428			28.3596	53.2108
	98.895	86.207			7.57043	35.8716
	86.4727	67.081			52.6578	38.7713
	82.2803	58.0481			104.365	11.1639
	110.309	132.121			102.876	74.3141
	78.4705	88.786			244.384	38.4808
	114.256	51.3841			130.676	6.35361
	147.862	96.8221			98.2177	52.7653
	114.244	66.8044			28.3089	43.7311
					39.4612	13.0727
